# Supplementary material for: Collagen V oral administration decreases inflammation and remodeling of synovial membrane in experimental arthritis
Source: PubMed Central journal article supplement (PMC6066207; doi:10.1371/journal.pone.0201106), 2018-07-30
Supplement: pone.0201106.s001.pdf [file pone.0201106.s001.pdf]

**INFLAMMATORY CELL**

---

| <b>Suppl</b> | <b>AI</b> | <b>AI/Suppl</b> |
|--------------|-----------|-----------------|
| 7,25         | 38,50     | 1,09            |
| 5,27         | 19,11     | 4,83            |
| 3,90         | 35,51     | 11,39           |
| 4,31         | 36,47     | 14,86           |
| 2,80         | 14,86     | 4,25            |
| 3,29         | 12,27     | 3,26            |
| 2,85         | 14,44     | 2,29            |
| 3,03         | 21,86     | 6,08            |
| 1,41         | 30,76     | 14,64           |
| 3,85         | 10,98     | 8,33            |
|              | 22,81     | 9,57            |

---

**EDEMA**

---

| <b>Suppl</b> | <b>AI</b> | <b>AI/Suppl</b> |
|--------------|-----------|-----------------|
| 4,60         | 40,71     | 20,44           |
| 1,81         | 16,28     | 16,57           |
| 2,22         | 59,97     | 17,28           |
| 0,95         | 41,08     | 17,07           |
| 0,80         | 31,27     | 14,63           |
| 3,95         | 53,42     | 17,73           |
| 5,20         | 43,69     | 13,31           |
| 4,71         | 54,69     | 24,12           |
| 9,13         | 26,78     | 15,67           |
| 8,22         | 40,32     | 16,20           |

---

**CD-3 Expression**

---

| <b>Suppl</b> | <b>AI</b> | <b>AI/Suppl</b> |
|--------------|-----------|-----------------|
| 4,69         | 49,83     | 31,63           |
| 3,60         | 51,41     | 19,08           |
| 4,53         | 41,69     | 30,69           |
| 5,77         | 58,34     | 28,48           |
| 4,53         | 54,69     | 26,08           |
| 1,11         | 55,00     | 25,00           |
| 6,26         | 62,63     | 34,45           |
| 4,25         | 45,13     | 31,59           |
|              | 54,57     | 12,29           |
|              | 64,06     |                 |

---

**CD-20 Expression**

---

| <b>Suppl</b> | <b>AI</b> | <b>AI/Suppl</b> |
|--------------|-----------|-----------------|
| 6,36         | 26,16     | 4,42            |
| 5,28         | 27,49     | 1,29            |
| 5,18         | 31,38     | 8,22            |
| 5,73         | 35,93     | 7,67            |
| 3,49         | 28,09     | 3,22            |
| 3,78         | 40,31     | 4,24            |
| 2,76         | 25,65     | 7,66            |
| 2,66         | 48,30     | 6,98            |
| 3,87         | 32,49     | 3,54            |
| 2,36         | 28,74     | 6,28            |
|              | 26,28     | 3,62            |

---

**CD-68 Expression**

---

| <b>Suppl</b> | <b>AI</b> | <b>AI/Suppl</b> |
|--------------|-----------|-----------------|
| 0,44         | 22,57     | 2,51            |
| 0,63         | 24,32     | 1,67            |
| 0,90         | 19,03     | 0,00            |
| 0,00         | 26,38     | 0,00            |
| 0,00         | 23,03     | 0,83            |
| 1,23         | 22,72     | 2,00            |
| 0,00         | 39,02     | 0,00            |
| 0,00         | 35,45     | 2,66            |
| 0,00         | 39,63     | 7,22            |
|              | 24,51     |                 |

---

### Morphometric evaluation

---

| <b>Suppl/<br/>THICK<br/>FIBERS</b> | <b>Suppl/ THIN</b> | <b>AI /THICK<br/>FIBERS</b> | <b>AI/ THIN</b> | <b>AI/Suppl THICK<br/>FIBERS</b> | <b>AI/Suppl THIN</b> |
|------------------------------------|--------------------|-----------------------------|-----------------|----------------------------------|----------------------|
| 16,425910                          | 7,702762           | 8,795013                    | 1,323189        | 11,534920                        | 3,271857             |
| 21,181610                          | 6,679328           | 12,700050                   | 1,838061        | 13,586690                        | 1,467191             |
| 18,543750                          | 6,889996           | 8,001597                    | 1,010207        | 18,799510                        | 5,493134             |
| 19,969780                          | 6,884322           | 12,530320                   | 2,643584        | 15,578540                        | 1,684656             |
| 18,529310                          | 5,684024           | 11,281330                   | 3,140776        | 12,970950                        | 5,888759             |
| 21,288600                          | 3,504873           | 14,152790                   | 3,891410        | 8,702916                         | 0,5842276            |
|                                    | 6,455498           | 14,612710                   | 1,900464        | 14,396210                        | 6,400536             |
|                                    |                    | 8,260099                    | 1,273918        | 12,284950                        | 1,836897             |
|                                    |                    | 14,155570                   |                 | 12,396130                        | 1,570980             |
|                                    |                    | 7,393711                    |                 | 11,352580                        | 5,739239             |

---

### COLLAGEN I Quantification

---

| <b>Suppl</b> | <b>AI</b> | <b>AI/Suppl</b> |
|--------------|-----------|-----------------|
| 53,652580    | 24,50433  | 32,9897         |
| 60,649360    | 27,41000  | 24,5000         |
| 39,671500    | 21,79453  | 28,3800         |
| 78,027600    | 28,80000  | 36,1100         |
| 41,727940    | 32,98000  | 35,4400         |
|              |           | 40,2200         |

---

### COLLAGEN V Quantification

---

| <b>Suppl</b> | <b>AI</b> | <b>AI/Suppl</b> |
|--------------|-----------|-----------------|
| 9,508237     | 36,712220 | 9,282611        |
| 10,130370    | 13,907590 | 10,966340       |
| 8,347500     | 16,786120 | 1,441582        |
| 10,087950    | 17,613000 | 7,630000        |
| 10,055000    | 14,980010 | 9,987002        |

---

### MMP-2 Expression

---

| <b>Suppl</b> | <b>AI</b> | <b>AI/Suppl</b> |
|--------------|-----------|-----------------|
| 7,87         | 26,56     | 9,03            |
| 6,88         | 27,00     | 3,79            |
| 4,82         | 44,30     | 3,96            |
| 7,79         | 40,85     | 4,94            |
| 8,61         | 27,82     | 5,19            |
| 5,53         | 37,49     | 13,91           |
| 8,14         | 22,01     | 5,73            |
| 7,54         | 32,35     | 12,76           |
| 6,89         | 30,56     | 11,30           |
| 5,35         |           |                 |

---

### CASPASE-9 expression

---

| <b>Suppl</b> | <b>AI</b> | <b>AI/Suppl</b> |
|--------------|-----------|-----------------|
| 0,00         | 0,83      | 2,08            |
| 0,00         | 1,26      | 12,06           |
| 1,00         | 0,00      | 1,87            |
| 0,00         | 0,00      | 3,00            |
| 0,00         | 2,01      | 7,09            |
| 0,00         | 2,87      | 3,31            |
| 1,05         | 1,22      | 1,39            |
| 0,00         | 1,80      | 3,01            |
| 0,00         | 0,00      |                 |
| 0,45         |           |                 |

---

**IL-1B – serum quantification (Pg/mL)**

---

| <b>Suppl</b> | <b>AI</b> | <b>AI/Suppl</b> |
|--------------|-----------|-----------------|
| 0,54         | 32,67     | 5,26            |
| 0,44         | 27,16     | 3,31            |
| 1,74         | 31,68     | 0,00            |
| 1,18         | 16,09     | 1,05            |
| 0,65         | 19,63     | 3,79            |
| 0,59         | 27,10     | 3,71            |
| 1,85         | 29,04     | 2,28            |
| 1,02         | 43,58     | 1,43            |
| 0,78         | 39,61     | 1,00            |
|              | 20,61     | 1,51            |
|              | 19,31     | 1,53            |

---

**IL-10 – serum quantification (Pg/mL)**

---

| <b>Suppl</b> | <b>AI</b> | <b>AI/Suppl</b> |
|--------------|-----------|-----------------|
| 0,90         | 67,49     | 6,7700          |
| 1,36         | 46,52     | 7,4500          |
| 3,37         | 56,30     | 0,8300          |
| 0,00         | 34,26     | 2,2727          |
| 2,09         | 49,26     | 1,0500          |
| 0,87         | 61,40     | 0,0000          |
| 0,00         | 69,49     | 0,8700          |
| 0,00         | 43,46     | 2,8600          |
| 0,00         | 40,99     | 1,1400          |
| 4,18         | 38,26     | 0,8300          |
| 2,48         | 32,41     | 2,6700          |

---

**TNF Expression**

---

| <b>Suppl</b> | <b>AI</b> | <b>AI/Suppl</b> |
|--------------|-----------|-----------------|
| 1,35         | 14,02     | 2,26            |
| 1,47         | 29,80     | 1,99            |
| 1,11         | 12,00     | 1,22            |
| 1,49         | 13,50     | 1,61            |
| 1,55         | 15,50     | 1,75            |
| 1,47         | 14,64     | 3,25            |
| 1,83         | 22,96     | 1,35            |
| 1,75         | 14,90     | 1,61            |
| 1,35         | 13,36     | 1,99            |

---

**IL-17 Expression**

---

| <b>Suppl</b> | <b>AI</b> | <b>AI/Suppl</b> |
|--------------|-----------|-----------------|
| 0,35         | 39,54     | 2,26            |
| 0,39         | 21,09     | 3,04            |
| 0,41         | 21,12     | 1,82            |
| 3,41         | 26,00     | 1,82            |
| 0,89         | 25,60     | 2,02            |
| 0,80         | 22,04     | 0,52            |
| 0,39         | 31,08     | 1,15            |
| 0,33         | 33,06     | 0,45            |
| 0,52         | 23,07     | 0,18            |

---
